# Supplementary material for: Lanthanide discs chill well and relax slowly
Source: Royal Society of Chemistry journal article supplement (doi:10.1039/c1cc12252e), 2011-01-01
Supplement: c1cc12252e.pdf [file c1cc12252e.pdf]

Supplementary Information for

## Lanthanide Discs Chill Well and Relax Slowly

Joseph W. Sharples,<sup>a</sup> Yan-Zhen Zheng,<sup>a</sup> Floriana Tuna,<sup>a</sup> Eric J. L. McInnes<sup>a</sup> and David Collison<sup>\*a</sup>

<sup>a</sup> School of Chemistry, The University of Manchester, Oxford Road, Manchester, M13 9PL, United Kingdom. Fax: +44 (0) 161 275 4598; Tel: +44 (0) 161 306 9260; E-mail: [david.collison@manchester.ac.uk](mailto:david.collison@manchester.ac.uk)

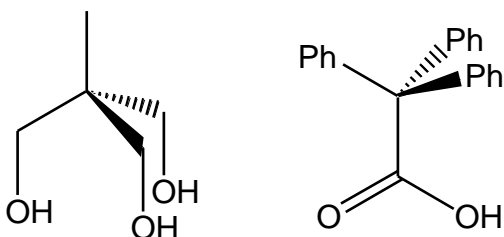

**Fig S1.** Schematic of organic ligands thmeH<sub>3</sub> (left) and tpaH (right).

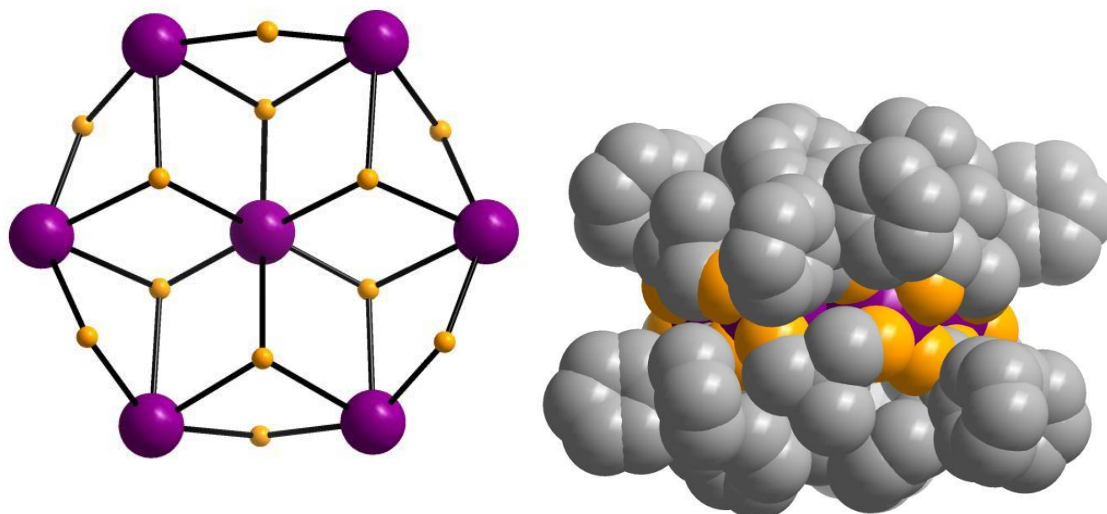

**Fig. S2.** Left: core of Ln<sub>7</sub> [Ln (purple), O (yellow), C (grey), H omitted]. Right: Space-filling diagram, viewed in the Ln<sub>7</sub> plane.

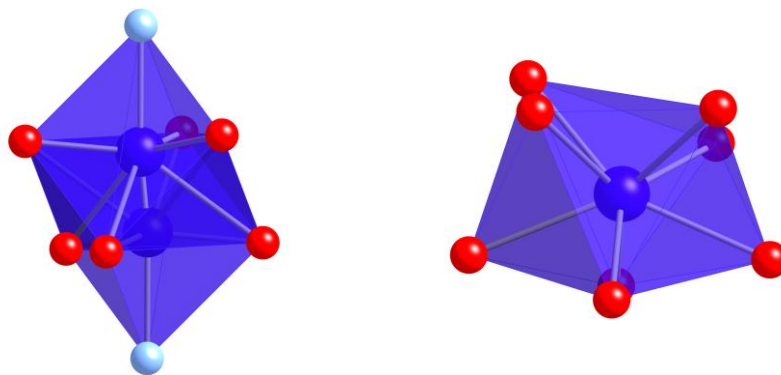

**Fig S3.** Views of the  $\{\text{LnN}_2\text{O}_6\}$  (left) and  $\{\text{LnO}_8\}$  (right) coordination polyhedra; the two disordered metal ion sites are shown in the former. The geometry at the central ion can be described as bi-capped compressed octahedral, with the caps on the trigonal compression axis (N-Dy-N). [An alternative description is as distorted cubic, with elongation along the N-Dy-N body diagonal.] The peripheral ions are lower symmetry, best described as bicapped trigonal prismatic.

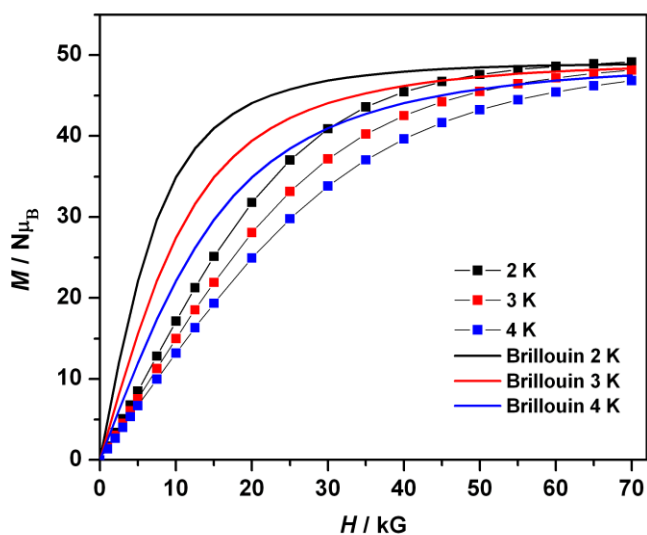

**Fig. S4.** Experimental  $M(H)$  for **2** at 2, 3 and 4 K, with calculated Brillouin curves for seven uncoupled  $s = 7/2$  ions ( $g = 2.0$ ).

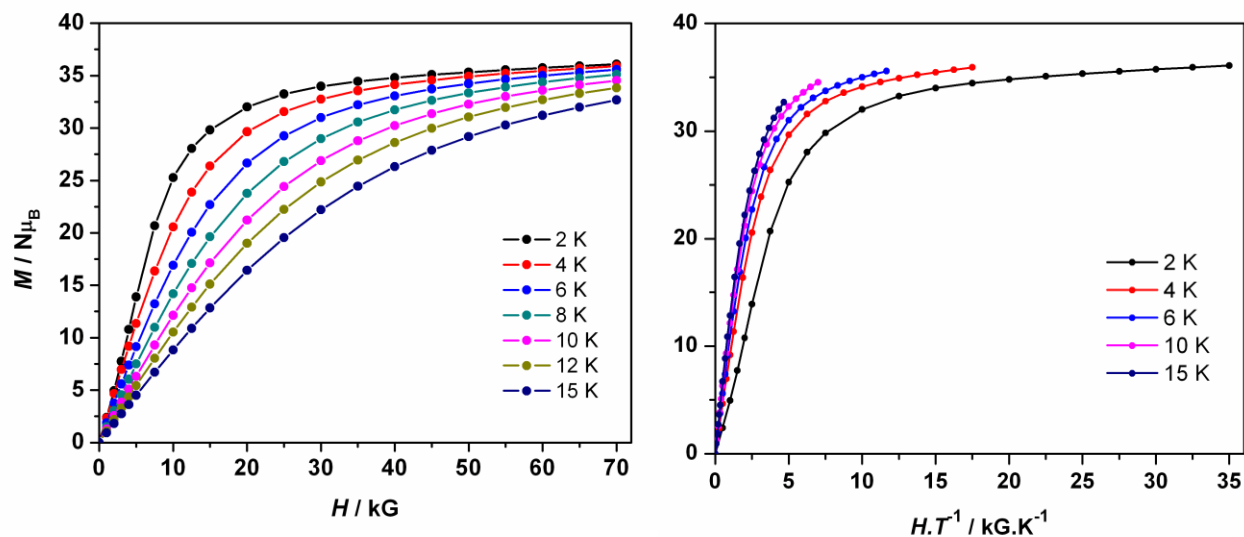

Fig. S5 Left:  $M(H)$  for **1** at 2-15 K. Right:  $M(H/T)$  for **1** at 2, 4, 6, 10 and 15 K

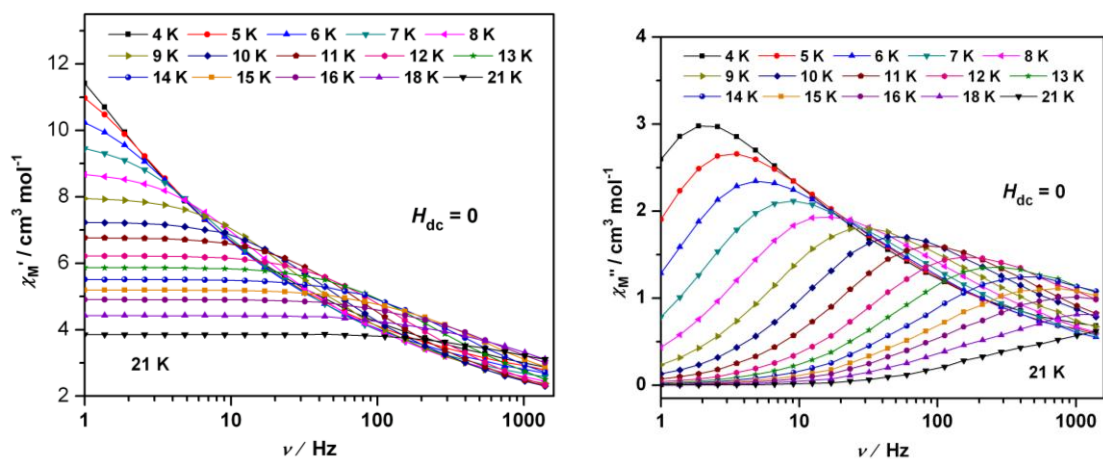

Fig S6. Frequency dependence (in zero-dc field) of the (left) in-phase ( $\chi_M'$ ) and (right) out-of-phase ( $\chi_M''$ ) ac susceptibility of **1** at several temperatures between 4 and 21 K.

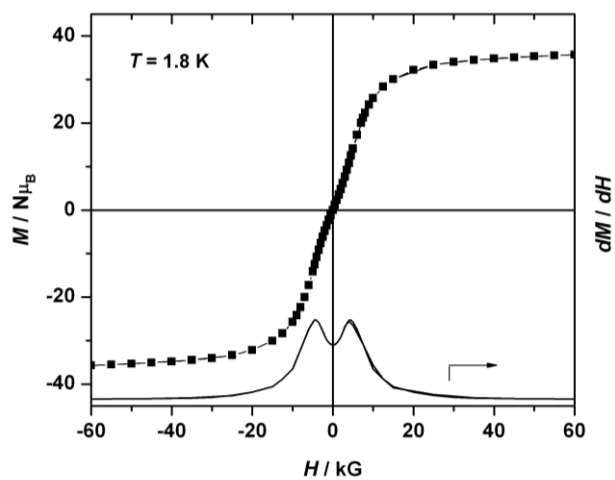

**Fig S7.**  $M(H)$  for **1** at 1.8 K between -60 and 60 kG.

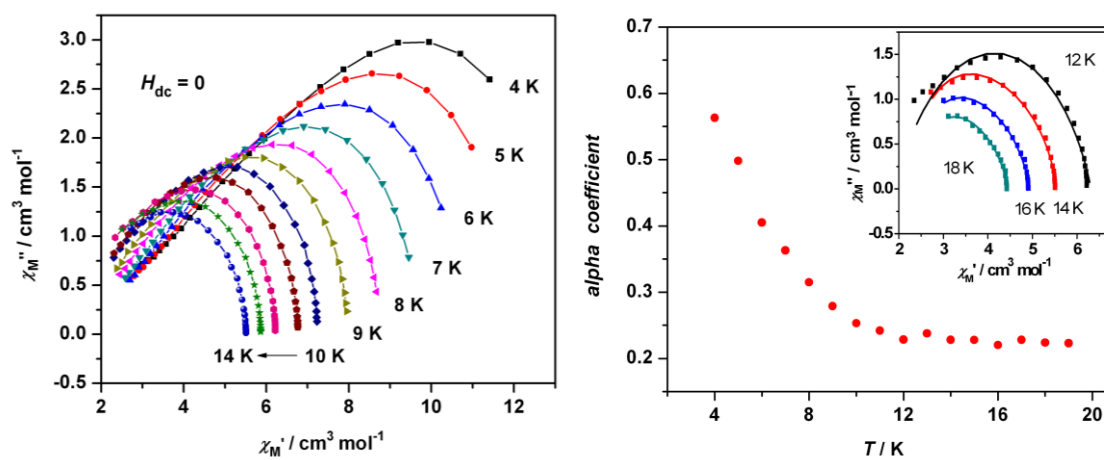

**Fig S8.** Left: Cole-Cole diagrams for **1** at different temperatures between 4 and 14 K. Right: temperature dependence of  $\alpha$  parameter from fits to Cole-Cole plots (shown as solid lines in inset).
